# Supplementary material for: Inhibition of epigenetic reader proteins by apabetalone counters inflammation in activated innate immune cells from Fabry disease patients receiving enzyme replacement therapy
Source: PubMed Central journal article supplement — Pharmacol Res Perspect. 2022 Apr 13;10(3):e00949. doi: 10.1002/prp2.949 (PMC9007222; doi:10.1002/prp2.949), 2022-04-13
Supplement: PRP2-10-e00949-s001.pdf [file PRP2-10-e00949-s001.pdf]

**Table S1. Medical history of FD Patients When Enrolled**

| <b>Patients</b> | <b>Age<br/>(gender)</b> | <b>Weight<br/>(kg)</b> | <b>eGFR</b> | <b>LysoGb3<sup>1</sup></b> | <b>Medical history<sup>2</sup></b>                                                                                                                                                                                                                             | <b>Medications</b>                                                                                |
|-----------------|-------------------------|------------------------|-------------|----------------------------|----------------------------------------------------------------------------------------------------------------------------------------------------------------------------------------------------------------------------------------------------------------|---------------------------------------------------------------------------------------------------|
| P1              | 74 (F)                  | 94                     | 75          | 1.2                        | proteinuria, LGE, incidental renal cyst (stable), left shoulder pain                                                                                                                                                                                           | Replagal, coversyl, tylenol, aspirin, vitamin D                                                   |
| P2              | 64 (F)                  | 64                     | 65          | 15.2                       | cardioversion, proteinuria, LGE                                                                                                                                                                                                                                | Fabrazyme, sotalol, metoprolol, lasix (postconversion), tylenol, coumadin, vitamin D, biotin      |
| P3              | 49 (M)                  | 59                     | 80          | 21.4                       | renal failure, renal transplant 2016, cardiac involvement with mild left ventricular dilation and biatrial enlargement, aortic root dilation, white matter lesions on brain MRI, corneal verticillata, high frequency hearing loss, hypertension, osteoporosis | Fabrazyme, ASA, tylenol, sulfatrim, myfortic, prednisone, tacrolimus, multivit, lasix             |
| P4              | 44 (F)                  | 66                     | 100         | 4.9                        | acroparesthesias, LGE, benign gallbladder polyps, simple right renal cyst of no significance, sternal pain, mild proteinuria, corneal verticillata, first-degree AV block, asthma, reduced tolerance to dilantin, intermittent pain in RUQ                     | Replagal, gabapentin, salmon oil, motrin, vitamin D, advair, ventolin, domperidone                |
| P5              | 64 (F)                  | 59                     | 93          | 10.8                       | Myocardial infarction                                                                                                                                                                                                                                          | Replagal, lipitor, ASA, tylenol, folic acid, calcium, vitamin D, nitroglycerin spray prn, cold FX |
| P6              | 63 (F)                  | 61                     | 57          | 14.8                       | hypertension, migraine headaches, D&C for endometrial polyp, cardiac involvement with increased LVMI, hearing loss; renal insufficiency with proteinuria and borderline GFR hypercholesterolemia, bunion, corneal verticillata, acroparesthesias               | Replagal, coversyl, crestor, aspirin, folic acid, vitamin D, calcium, nitroglycerin prn           |

|    |        |    |    |      |                                                                                                                                 |                                                                                                                                                                                                                        |
|----|--------|----|----|------|---------------------------------------------------------------------------------------------------------------------------------|------------------------------------------------------------------------------------------------------------------------------------------------------------------------------------------------------------------------|
| P7 | 59 (M) | 86 | 44 | 39.3 | LVH, stent replacement, renal insufficiency, hearing loss, neuropathy, hypertension, brain calcification, COPD, iron deficiency | Replagal, cozaar, crestor, dilantin, tylenol, aspirin, brilinta, effexor, pantoprazole, folic acid, Omega-3, vitamin D, multivitamin, Spiriva inhaler, ferrous sulfate, Coenzyme Q10, ativan @ hs, apo-ISMN, potassium |
| P8 | 63 (F) | 86 | 50 | 18.9 | LVH with LGE, CKD stage 3, proteinuria, ocular involvement, hearing loss, degenerative c-spine                                  | Replagal, hydrochlorothiazide, losartan, lipitor, ASA, gabapentin, zantac, ropinirole, Omega-3, calcium, Coenzyme Q10, folic acid                                                                                      |

Notes:

1. lysoGb3 and Gb3 is detected untargeted mass spectrometry metabolomic approaches
2. LVH is abbreviated from left ventricular hypertrophy; LGE stands for late gadolinium enhancement; COPD: chronic obstructive pulmonary disease; CKD: chronic kidney disease

**Table S2. Cytokine Profile of Plasma from FD Patients versus Normal Donors**

| <b>Cytokines</b> | <b>Normal donors (n=6)<br/>(median[IQR], pg/mL)</b> | <b>ERT-treated FD (n=8)<br/>(median[IQR], pg/mL)</b> | <b><i>p</i>-value<br/>(Mann Whitney)</b> | <b>Adjusted<br/><i>p</i>-value<br/>(BH)</b> |
|------------------|-----------------------------------------------------|------------------------------------------------------|------------------------------------------|---------------------------------------------|
| MCP-1            | <b>101.00 [39.42]</b>                               | <b>244.23 [50.63]</b>                                | <b>0.0007</b>                            | <b>0.0062</b>                               |
| MDC              | <b>334.95 [74.09]</b>                               | <b>958.42 [525.75]</b>                               | <b>0.0007</b>                            | <b>0.0062</b>                               |
| PDGF-AA          | <b>345.68 [55.64]</b>                               | <b>952.45 [608.55]</b>                               | <b>0.0007</b>                            | <b>0.0062</b>                               |
| RANTES           | <b>171.67 [100.05]</b>                              | <b>604.08 [274.67]</b>                               | <b>0.0007</b>                            | <b>0.0062</b>                               |
| sCD40L           | <b>453.81 [131.27]</b>                              | <b>1466.96 [959.29]</b>                              | <b>0.0013</b>                            | <b>0.0099</b>                               |
| IP-10            | <b>60.94 [15.57]</b>                                | <b>239.53 [118.41]</b>                               | <b>0.0027</b>                            | <b>0.0164</b>                               |
| TNF- $\alpha$    | <b>8.45 [4.39]</b>                                  | <b>21.28 [16.83]</b>                                 | <b>0.0047</b>                            | <b>0.0246</b>                               |
| GM-CSF           | <b>99.26 [52.32]</b>                                | <b>33.95 [10.68]</b>                                 | <b>0.0080</b>                            | <b>0.0370</b>                               |
| PDGF-BB          | 2915.13 [730.19]                                    | 5579.99 [3168.83]                                    | 0.0200                                   | 0.0821                                      |
| IL-3             | 0.55 [0.11]                                         | 0.68 [0.32]                                          | 0.0384                                   | 0.1422                                      |
| IL-15            | 2.57 [0.44]                                         | 4.22 [2.42]                                          | 0.0426                                   | 0.1434                                      |
| Fractalkine      | 69.73 [22.96]                                       | 127.72 [37.85]                                       | 0.0813                                   | 0.2505                                      |
| MIP-1B           | 25.79 [23.57]                                       | 55.70 [28.66]                                        | 0.1419                                   | 0.4038                                      |
| IL-12p70         | 2.99 [3.19]                                         | 6.18 [4.11]                                          | 0.1748                                   | 0.4619                                      |
| IL-4             | 94.23 [120.37]                                      | 52.33 [34.20]                                        | 0.2284                                   | 0.5635                                      |
| IFN- $\gamma$    | 6.98 [2.96]                                         | 6.04 [3.35]                                          | 0.2824                                   | 0.6146                                      |
| IL-1 $\alpha$    | 15.66 [30.22]                                       | 43.94 [65.96]                                        | 0.2824                                   | 0.6146                                      |
| IL-17A           | 4.72 [5.33]                                         | 2.38 [1.45]                                          | 0.3450                                   | 0.6376                                      |
| VEGF-A           | 58.63 [38.31]                                       | 25.61 [61.68]                                        | 0.3450                                   | 0.6376                                      |
| IL-9             | 0.78 [1.22]                                         | 2.44 [2.99]                                          | 0.3656                                   | 0.6376                                      |
| IL-13            | 3.09 [5.33]                                         | 2.10 [3.72]                                          | 0.3998                                   | 0.6376                                      |
| IL-1 $\beta$     | 2.97 [4.19]                                         | 2.16 [1.20]                                          | 0.4009                                   | 0.6376                                      |
| FGF-2            | 133.30 [42.03]                                      | 110.31 [21.10]                                       | 0.4136                                   | 0.6376                                      |
| IL-1RA           | 34.17 [41.61]                                       | 30.63 [15.46]                                        | 0.4136                                   | 0.6376                                      |
| IL-2             | 0.82 [0.39]                                         | 1.41 [0.94]                                          | 0.4381                                   | 0.6483                                      |
| IL-12p40         | 56.54 [29.22]                                       | 51.27 [29.62]                                        | 0.4772                                   | 0.6791                                      |

|                |                |                |        |        |
|----------------|----------------|----------------|--------|--------|
| MIP-1 $\alpha$ | 7.19 [5.65]    | 6.22 [2.48]    | 0.5608 | 0.7569 |
| TGF- $\alpha$  | 1.40 [0.66]    | 1.00 [1.23]    | 0.5728 | 0.7569 |
| IFN $\alpha$ 2 | 58.67 [30.23]  | 54.64 [10.96]  | 0.6507 | 0.8165 |
| IL-8           | 7.73 [15.65]   | 7.71 [4.64]    | 0.6620 | 0.8165 |
| EGF            | 150.23 [98.28] | 191.21 [87.95] | 0.8518 | 0.9761 |
| G-CSF          | 31.21 [18.46]  | 32.78 [21.84]  | 0.8518 | 0.9761 |
| Eotaxin        | 62.12 [22.76]  | 64.08 [42.67]  | 0.9497 | 0.9761 |
| IL-5           | 0.58 [0.80]    | 0.51 [0.33]    | 0.9497 | 0.9761 |
| IL-7           | 2.26 [1.01]    | 2.72 [1.35]    | 0.9497 | 0.9761 |
| MCP-3          | 15.51 [22.93]  | 23.25 [33.04]  | 0.9497 | 0.9761 |
| IL-10          | 1.31 [0.92]    | 1.85 [1.58]    | 1.0000 | 1.0000 |

**Table S3. Cytokine Profile of Plasma in FD patients**

| <b>Cytokines</b> | <b>eGFR&gt;60 (n=4)<br/>(Mean ± SD, pg/mL)</b> | <b>eGFR&lt;60 (n=3)<br/>(Mean ± SD, pg/mL)</b> | <b>p-value<br/>(Mann Whitney)</b> | <b>Adjusted<br/>p-value (BH)</b> |
|------------------|------------------------------------------------|------------------------------------------------|-----------------------------------|----------------------------------|
| FGF-2            | 123.01 ± 8.04                                  | 101.16 ± 10.00                                 | 0.06                              | 0.41                             |
| IL-10            | 2.49 ± 1.02                                    | 0.76 ± 0.24                                    | 0.06                              | 0.41                             |
| PDGF-BB          | 4651.49 ± 327.41                               | 7561.87 ± 1277.41                              | 0.06                              | 0.41                             |
| sCD40L           | 944.49 ± 197.24                                | 2045.00 ± 245.43                               | 0.06                              | 0.41                             |
| IL-4             | 174.73 ± 224.34                                | 36.39 ± 1.36                                   | 0.06                              | 0.41                             |
| MIP-1a           | 7.66 ± 1.91                                    | 4.67 ± 1.26                                    | 0.07                              | 0.41                             |
| TGF-α            | 1.85 ± 1.01                                    | 0.69 ± 0.26                                    | 0.11                              | 0.41                             |
| IL-15            | 4.70 ± 1.29                                    | 3.14 ± 0.66                                    | 0.11                              | 0.41                             |
| IL-2             | 1.53 ± 0.46                                    | 0.76 ± 0.48                                    | 0.11                              | 0.41                             |
| IL-5             | 1.43 ± 1.59                                    | 0.37 ± 0.14                                    | 0.11                              | 0.41                             |
| TNF-β            | 247.20 ± 411.68                                | 3.12 ± 3.66                                    | 0.11                              | 0.41                             |
| Eotaxin          | 78.22 ± 32.54                                  | 51.17 ± 32.60                                  | 0.23                              | 0.47                             |
| G-CSF            | 39.82 ± 11.86                                  | 25.15 ± 5.48                                   | 0.23                              | 0.47                             |
| Fractalkine      | 136.04 ± 34.10                                 | 101.54 ± 28.11                                 | 0.23                              | 0.47                             |
| IFN-γ            | 5.64 ± 1.72                                    | 3.68 ± 2.44                                    | 0.23                              | 0.47                             |
| MCP-3            | 88.62 ± 112.72                                 | 9.88 ± 6.72                                    | 0.23                              | 0.47                             |
| MDC              | 1072.20 ± 350.97                               | 762.11 ± 155.40                                | 0.23                              | 0.47                             |
| IL-7             | 2.25 ± 0.57                                    | 3.05 ± 0.97                                    | 0.23                              | 0.47                             |
| RANTES           | 645.90 ± 221.69                                | 1354.61 ± 1155.24                              | 0.23                              | 0.47                             |
| IL-12p70         | 7.21 ± 2.66                                    | 4.65 ± 1.86                                    | 0.28                              | 0.53                             |
| IL-1β            | 2.85 ± 1.75                                    | 1.68 ± 0.61                                    | 0.28                              | 0.53                             |
| IL-13            | 17.58 ± 29.05                                  | 0.47 ± 0.42                                    | 0.37                              | 0.60                             |
| IL-1α            | 344.94 ± 591.78                                | 26.80 ± 11.53                                  | 0.40                              | 0.60                             |
| IL-9             | 10.27 ± 14.99                                  | 0.95 ± 0.32                                    | 0.40                              | 0.60                             |
| IL-6             | 22.18 ± 36.65                                  | 0.79 ± 0.26                                    | 0.40                              | 0.60                             |
| TNF-α            | 19.89 ± 11.94                                  | 27.94 ± 12.07                                  | 0.40                              | 0.60                             |
| EGF              | 179.89 ± 55.68                                 | 147.41 ± 82.30                                 | 0.63                              | 0.77                             |

|                 |                     |                      |      |      |
|-----------------|---------------------|----------------------|------|------|
| IL-17 $\alpha$  | 3.58 $\pm$ 3.00     | 2.05 $\pm$ 1.21      | 0.63 | 0.77 |
| IL-3            | 0.67 $\pm$ 0.17     | 0.76 $\pm$ 0.17      | 0.63 | 0.77 |
| IP-10           | 180.39 $\pm$ 96.94  | 230.95 $\pm$ 68.97   | 0.63 | 0.77 |
| MCP-1           | 234.79 $\pm$ 13.09  | 309.57 $\pm$ 99.29   | 0.63 | 0.77 |
| MIP-1 $\beta$   | 43.50 $\pm$ 15.27   | 59.76 $\pm$ 34.49    | 0.63 | 0.77 |
| PDGF-AA         | 953.30 $\pm$ 340.11 | 1043.00 $\pm$ 415.49 | 0.86 | 0.93 |
| IL-1ra          | 30.45 $\pm$ 15.25   | 30.98 $\pm$ 7.96     | 0.86 | 0.93 |
| IL-8            | 21.03 $\pm$ 25.67   | 7.01 $\pm$ 1.24      | 0.86 | 0.93 |
| IL-12p40        | 46.98 $\pm$ 13.91   | 37.23 $\pm$ 20.58    | 0.86 | 0.93 |
| GM-CSF          | 31.82 $\pm$ 6.17    | 37.29 $\pm$ 14.40    | 1.00 | 1.00 |
| IFN- $\alpha$ 2 | 51.65 $\pm$ 7.88    | 52.63 $\pm$ 8.86     | 1.00 | 1.00 |
| VEGF-A          | 40.54 $\pm$ 43.24   | 33.94 $\pm$ 31.00    | 1.00 | 1.00 |

**Table S4: Changes of Cytokine Production in LPS Stimulated PBMCs from ERT Treated FD Patients by *ex vivo* Apabetalone Treatment**

| Cytokine      | Fold induction by LPS | % Change from LPS+DMSO |                       |                        |                   |
|---------------|-----------------------|------------------------|-----------------------|------------------------|-------------------|
|               |                       | 1 $\mu$ M apabetalone  | 5 $\mu$ M apabetalone | 20 $\mu$ M apabetalone | JQ1 (0.2 $\mu$ M) |
| IL-12p70      | <b>83.9</b>           | -62.7                  | -92.3                 | -97.1                  | -97.4             |
| IL-12p40      | <b>20.2</b>           | <b>-51.9</b>           | <b>-91.7</b>          | <b>-97.3</b>           | <b>-97.9</b>      |
| MCP-3         | <b>1.6</b>            | <b>-67.9</b>           | <b>-91.1</b>          | <b>-93.9</b>           | <b>-93.2</b>      |
| IFN- $\gamma$ | <b>14.4</b>           | -54.4                  | -88.9                 | -98.4                  | -93.7             |
| IP-10         | <b>1.3</b>            | -46.5                  | -68.3                 | -75.0                  | -73.4             |
| GM-CSF        | <b>11.3</b>           | <b>-24.6</b>           | <b>-66.4</b>          | <b>-91.7</b>           | <b>-80.8</b>      |
| IL-10         | <b>14.3</b>           | <b>-24.8</b>           | <b>-51.2</b>          | <b>-82.7</b>           | <b>-74.6</b>      |
| IL-1RA        | <b>5.2</b>            | <b>-11.5</b>           | <b>-42.2</b>          | <b>-84.3</b>           | <b>-80.6</b>      |
| MDC           | <b>3.2</b>            | -18.3                  | -39.7                 | -49.0                  | -44.2             |
| IL-13         | <b>4.2</b>            | -3.1                   | <b>-39.0</b>          | <b>-59.0</b>           | <b>-19.2</b>      |
| sCD40L        | <b>1.4</b>            | -20.8                  | -26.4                 | <b>-54.5</b>           | <b>-29.6</b>      |
| IL-5          | <b>3.9</b>            | 12.0                   | -23.0                 | -52.5                  | -26.7             |
| PDGF-BB       | <b>2.0</b>            | -16.4                  | -9.5                  | 5.8                    | -9.9              |
| Flt-3L        | <b>1.6</b>            | -6.2                   | -9.3                  | -16.8                  | -14.7             |
| FGF-2         | <b>1.4</b>            | -2.4                   | -6.5                  | -7.4                   | 4.2               |
| Eotaxin       | <b>2.3</b>            | -3.8                   | -5.4                  | -16.3                  | -21.8             |
| PDGF-AA       | <b>1.2</b>            | -2.4                   | -2.3                  | -6.5                   | -4.9              |
| EGF           | <b>1.8</b>            | -1.1                   | 2.3                   | -3.2                   | -2.2              |
| RANTES        | <b>3.2</b>            | 14.4                   | 16.1                  | 7.7                    | -7.6              |
| IL-2          | <b>2.0</b>            | 26.6                   | 20.9                  | -37.5                  | -5.8              |
| IL-1 $\beta$  | <b>19.2</b>           | 13.3                   | 22.0                  | 15.6                   | 19.0              |
| Fractalkine   | <b>4.6</b>            | -45.4                  | 72.4                  | -50.1                  | 27.4              |

Notes: Cytokine induction in response to LPS is expressed as mean fold change relative to vehicle(DMSO control). Effect of apabetalone is shown as % change from LPS stimulation (LPS+DMSO). Bold and italic numbers indicate  $p < 0.05$  (student paired t test).

**Figure S1**

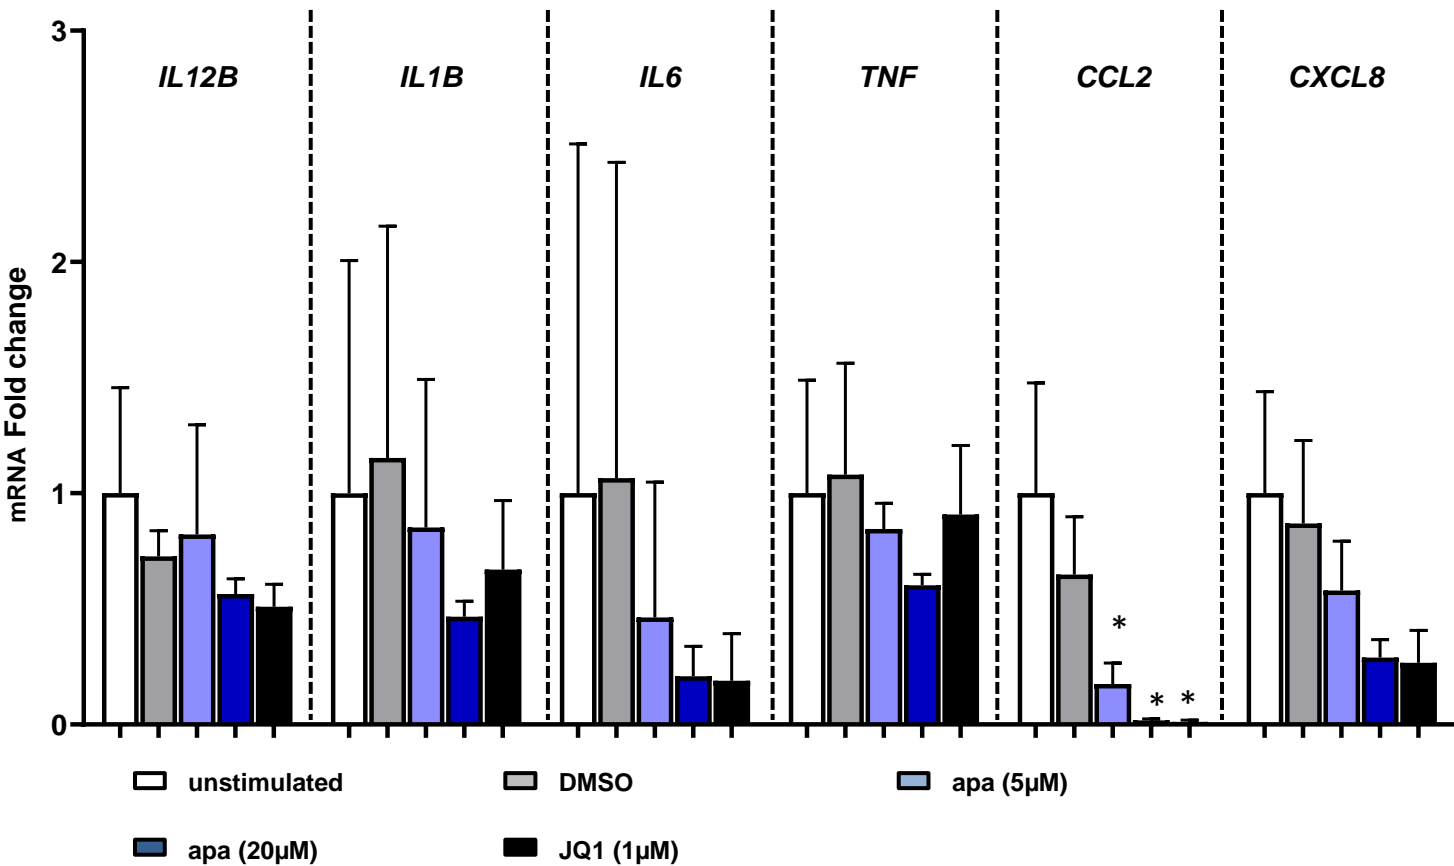

**Figure S1.** Apabetalone did not induce inflammation in unstimulated PBMCs from ERT treated FD patients (n=4). The data are shown as relative fold changes from the unstimulated baseline. Normalization was calculated as  $\Delta CT$  values in individual patients divided by the average  $\Delta CT$  value at the baseline in the tested patients. Bar graphs show the mean  $\pm$  SEM. Statistical significance was determined by one-way ANOVA followed by Dunnett's multiple comparison test relative to DMSO. \* $p < 0.05$



Figure S2

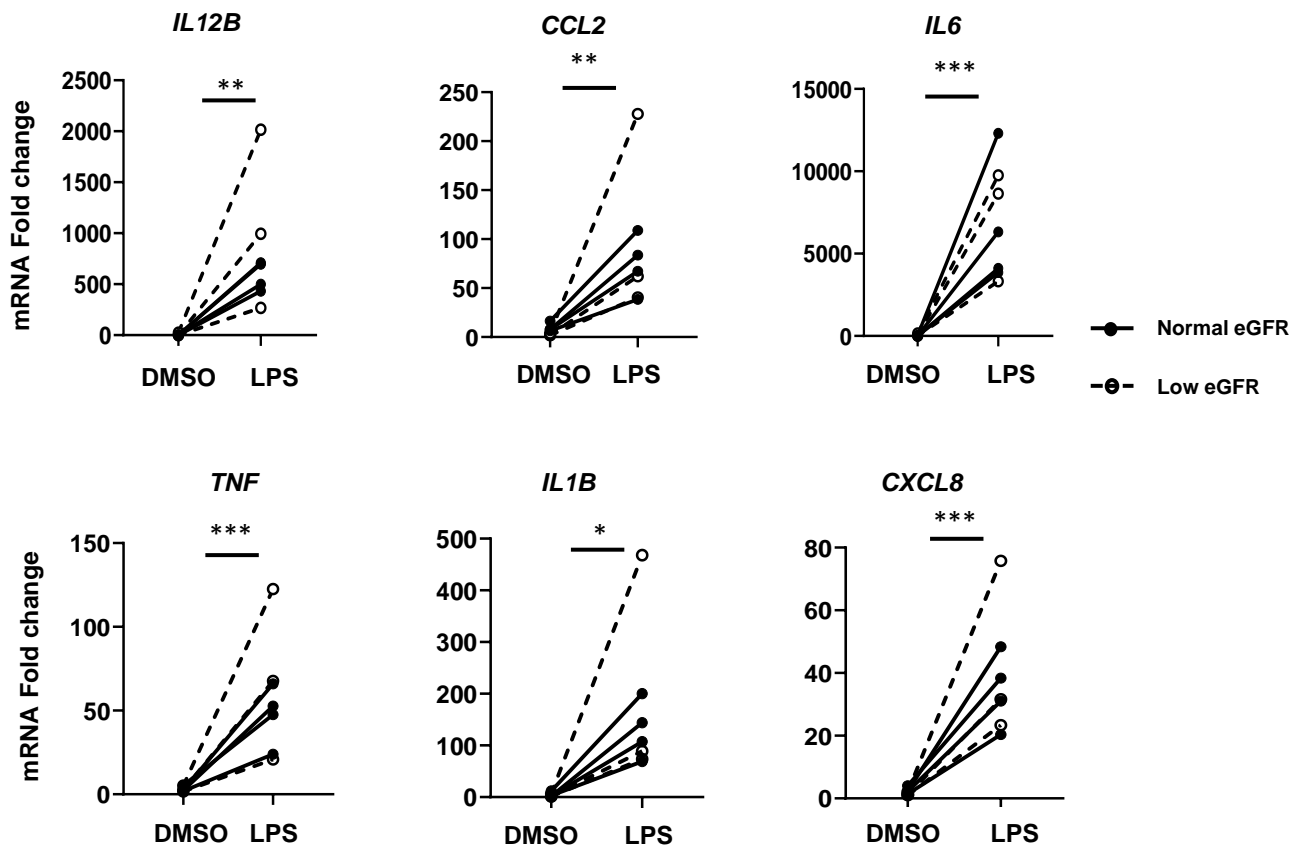

**Figure S2.** Induction of pro-inflammatory gene transcript levels in response to LPS stimulation in PBMCs from ERT treated FD patients (n=7). The data are shown as relative fold changes from the unstimulated baseline. Statistical significance was determined by the Wilcoxon test. \* $p < 0.05$ , \*\* $p < 0.01$ , \*\*\* $p < 0.001$

Figure S3

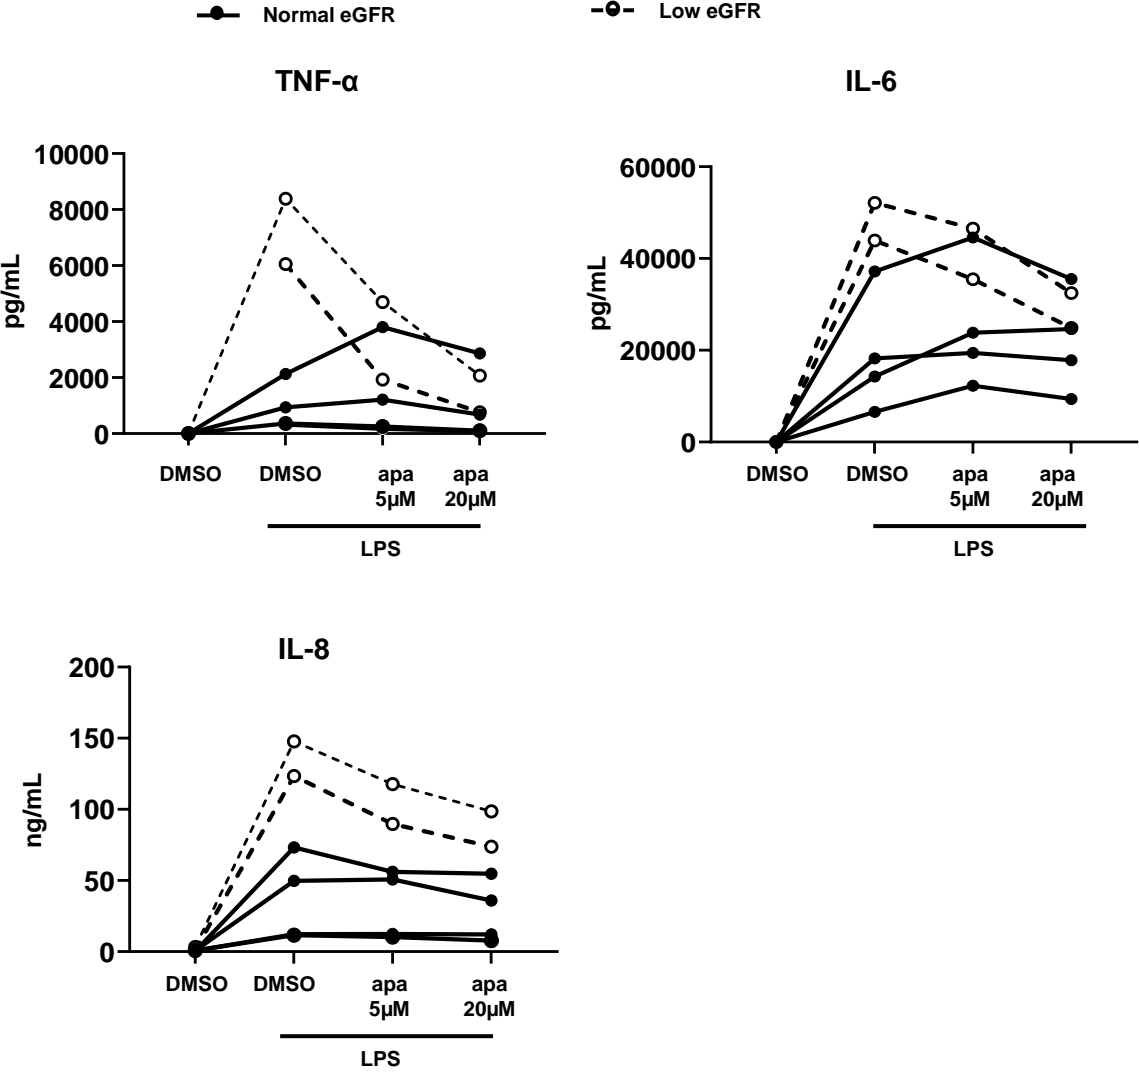

**Figure S3.** Levels of TNF- $\alpha$  and IL-6 secreted by PBMCs from ERT treated FD patients following 18 hours of LPS stimulation  $\pm$  apabetalone co-treatment. The expression was evaluated with bead-based flow cytometry and data was analyzed with FCAP. Each line represents an individual patient.

**Figure S4**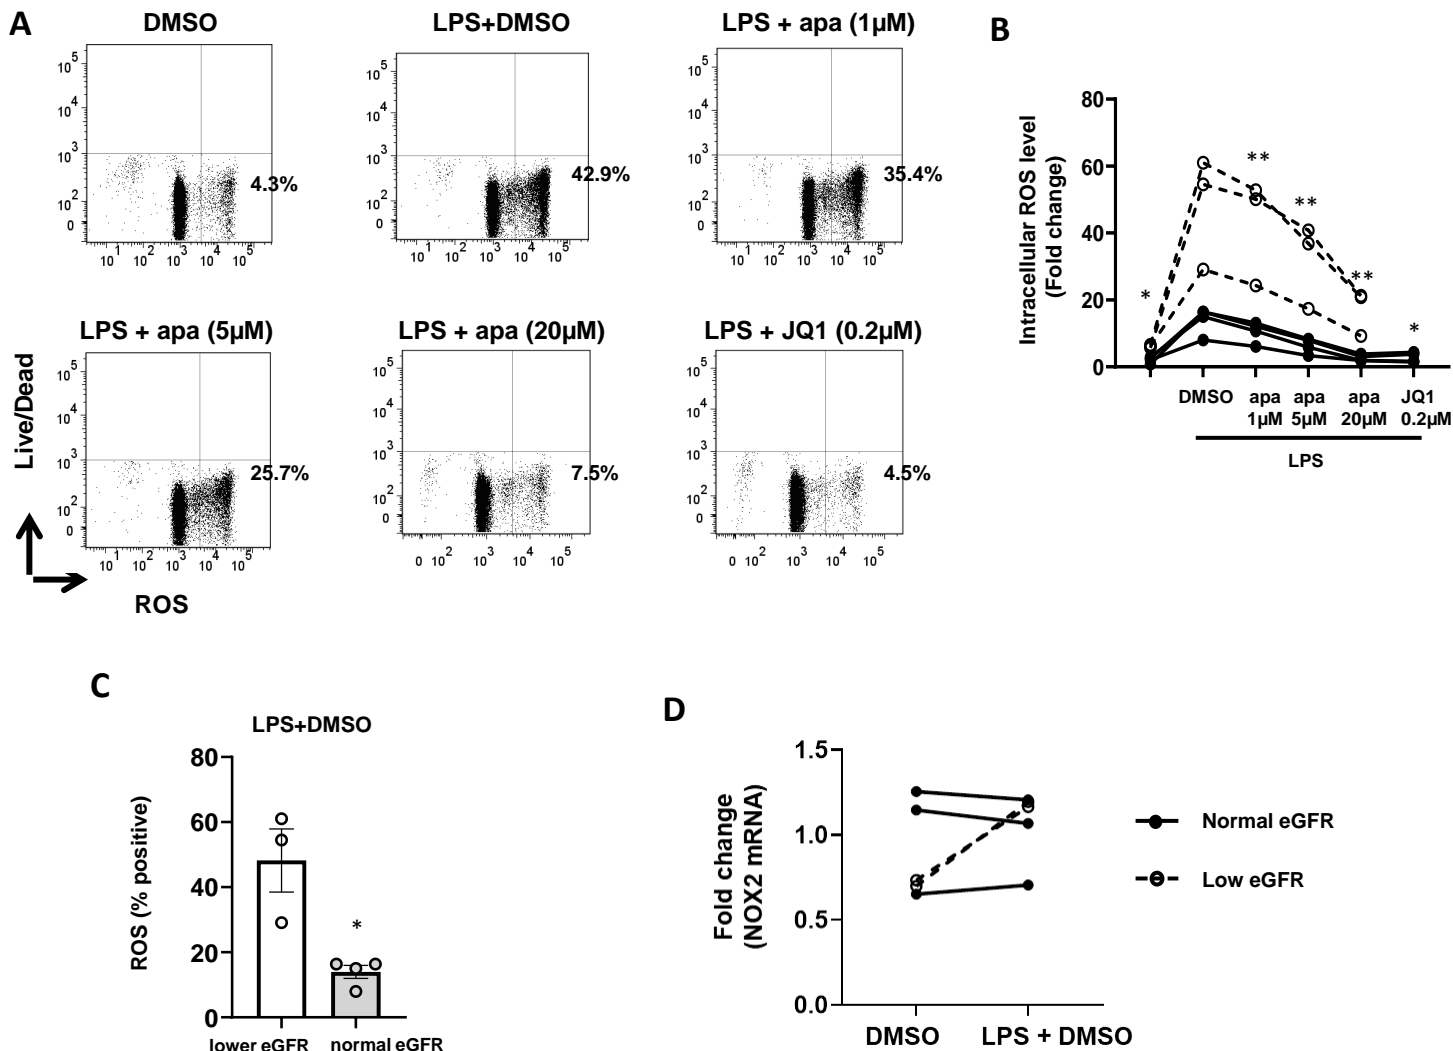

**Figure S4.** (A) Representative flow cytometric analysis of intracellular ROS production in neutrophils in response to LPS stimulation with 18 hours co-treatment of apabetalone or JQ1. (B) Average ROS levels as a percentage of ROS positive neutrophils from ERT treated FD patients with indicated eGFR levels ( $n=7$ ). (C) LPS-induced ROS levels in neutrophils from ERT treated FD patients with normal or lower eGFR levels. (D) Comparison of NOX2 mRNA levels in resting and activated neutrophils from ERT treated FD patients in response to 4 hours of LPS stimulation. Statistical significance was determined by one-way ANOVA followed by Dunnett's multiple comparison test relative to DMSO in B or Mann Whitney test in C. \* $p < 0.05$ , \*\* $p < 0.01$
